# Supplementary material for: Effects of Sodium Nitroprusside on Lipopolysaccharide-Induced Inflammation and Disruption of Blood–Brain Barrier
Source: MDPI journal article supplement (doi:10.3390/cells13100843), 2024-05-15
Supplement: s1 [file s1]

## Supplementary Materials

### Effects of sodium nitroprusside on LPS-induced inflammation and disruption of blood-brain barrier

Nuria Seoane<sup>1</sup>, Aitor Picos<sup>1</sup>, Sandra Moraña-Fernández<sup>1,2</sup>, Martina Schmidt<sup>3</sup>, Amalia Dolga<sup>3</sup>, Manuel Campos-Toimil<sup>1,4\*§</sup>, Dolores Viña<sup>1,4§</sup>

1. Physiology and Pharmacology of Chronic Diseases (FIFAEC) Center for Research in Molecular Medicine and Chronic Diseases (CiMUS), University of Santiago de Compostela, Santiago de Compostela, Spain; nu-ria.seoane@rai.usc.es; aitor.picos@rai.usc.es; manuel.campos@usc.es; mdolores.vina@usc.es
2. Present address: Cardiology Group, Center for Research in Molecular Medicine and Chronic Diseases (CI-MUS) and Institute of Biomedical Research of Santiago de Compostela (IDIS-SERGAS). Av. Barcelona, Campus Vida, 15782 Santiago de Compostela, Spain; sandra.morana.fernandez@usc.es
3. Department of Molecular Pharmacology, University of Groningen, Groningen, The Netherlands.; m.schmidt@rug.nl; a.m.dolga@rug.nl
4. Department of Pharmacology, Pharmacy and Pharmaceutical Technology. University of Santiago de Compostela, 15782 Santiago de Compostela, A Coruña, Spain

\* Correspondence: manuel.campos@usc.es

§ Equal contribution

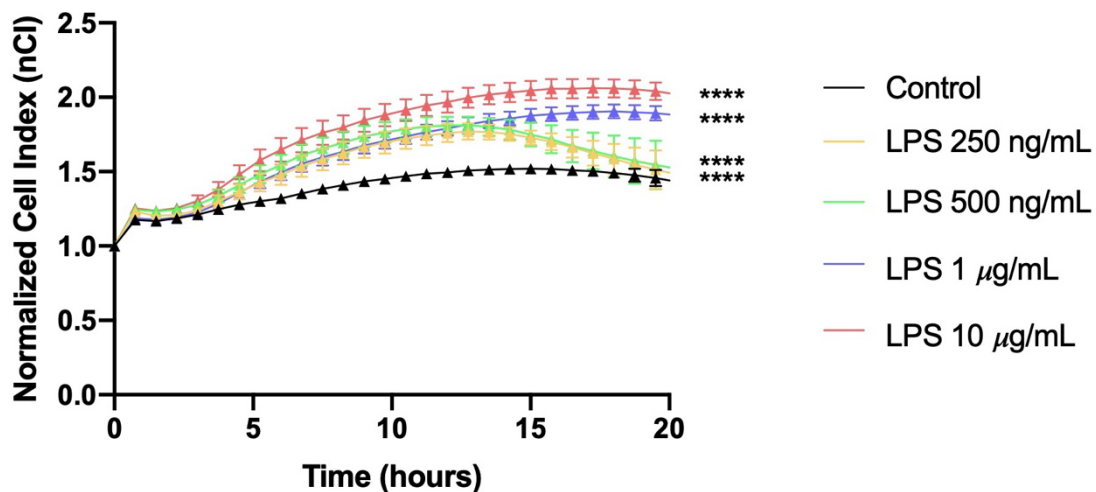

**Figure S1. Effect of increasing concentrations of LPS in cellular shape and/or morphology.** nCI of bEnd.3 cells exposed to increasing LPS concentrations (0.25, 0.5, 1 and 10 µg/mL) determined by xCELLigence RTCA. Results are given as mean ± SEM; n=5 technical replicates. All experiments were repeated at least four times. \*\*\*\*P<0.0001 with respect to control. Data were analyzed using 1-way ANOVA followed by Sidák's multiple comparisons test.

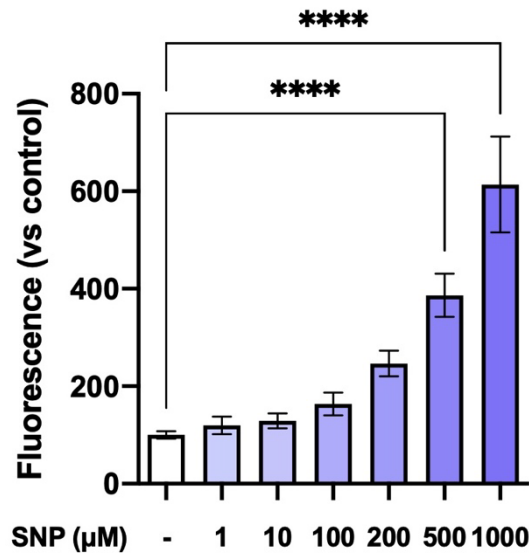

**Figure S2. Effect of increasing concentrations of SNP in ROS production.** Quantitative determination of ROS production of bEnd.3 cells exposed to increasing SNP concentrations. Results are given as mean  $\pm$  SEM; n=3 technical replicates. All experiments were repeated at least three times. \*\*\*\*P<0.0001 vs control. Data were analyzed using 1-way ANOVA followed by Sidák's multiple comparisons test.

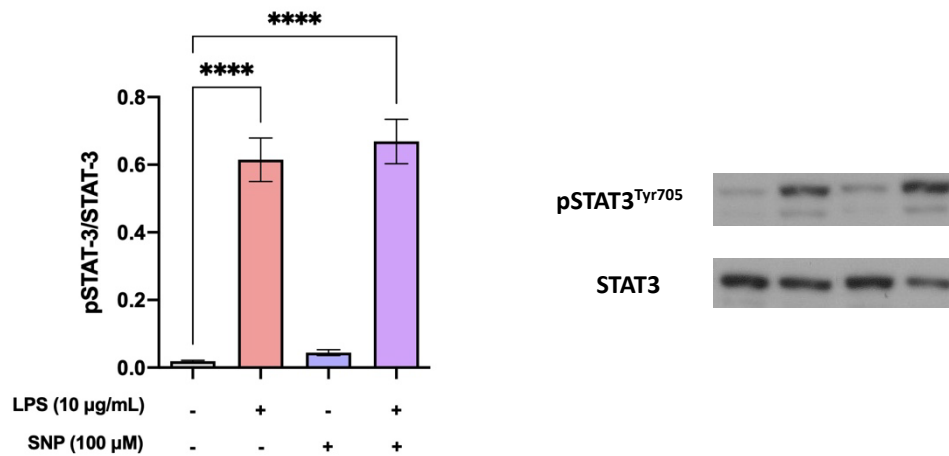

**Figure S3. Effect of SNP on LPS-induced STAT3 phosphorylation.** STAT3 phosphorylation analyzed by Western Blot after 6-hour exposure to LPS in the presence or absence of SNP. Results are given as mean  $\pm$  SD. Experiments were repeated at least four times. \*\*\*\*P<0.0001 vs as indicated in the graph. Data were analyzed using 1-way ANOVA followed by Sidák's multiple comparisons test.
